# Supplementary material for: A strong coupling mechanism between ferromagnetism and piezoelectricity in 2D ferroelectric CrXSYBrZ with high carrier mobility
Source: Royal Society of Chemistry journal article supplement (doi:10.1039/d4tc02409e), 2024-01-01
Supplement: d4tc02409e1.pdf [file d4tc02409e1.pdf]

# Supplementary Information

## Strong Coupling Mechanism between Ferromagnetism and Piezoelectricity in 2D Ferroelectric CrXSYBrZ with High Carrier Mobility

*Xiao Shang,<sup>1,2</sup> Gui-Juan Du,<sup>1</sup> Jun-Hui Wang,<sup>2</sup> Dan-Yang Zhu,<sup>1</sup> Fu-Chun Liu,<sup>1,\*</sup> Xi-Zhe  
Liu,<sup>1</sup> Zeng-Tao Lv,<sup>2</sup> Feng Guo,<sup>2</sup> and Xiao-Chun Wang<sup>2,\*</sup>*

*<sup>1</sup> Institute of Atomic and Molecular Physics, Jilin university, Changchun 130012,  
China*

*<sup>2</sup> School of Physics Science and Information Technology, Liaocheng University,  
Liaocheng 252000, China*

---

\* Corresponding author E-mail: [lfc@jlu.edu.cn](mailto:lfc@jlu.edu.cn) and [wangxiaochun@tsinghua.org.cn](mailto:wangxiaochun@tsinghua.org.cn)

## Transport and piezoelectric properties of CrSBr and CrXBrYSZ monolayers

The relaxed ion piezoelectric stress tensor is determined by combining the contributions from both ions and electrons:<sup>1</sup>

$$e_{ijk} = \frac{dP_i}{d\varepsilon_{jk}} = e_{ijk}^{ion} + e_{ijk}^{ele}, \quad (\text{S1})$$

where  $\varepsilon_{jk}$  is the stress tensor and  $P_i$  is the intrinsic polarization tensor.  $i, j$ , and  $k$  represent the  $x, y$ , and  $z$  axes, respectively. Similarly, the piezoelectric strain coefficient  $d_{ijk}$  can be defined as the derivative of the  $P_i$  with respect to the strain tensor  $\sigma_{jk}$ :

$$d_{ijk} = \frac{dP_i}{d\sigma_{jk}}, \quad (\text{S2})$$

For simplicity, in the condensed Voigt notation, the third-order tensors  $d_{ijk}$  and  $e_{ijk}$  are commonly denoted as  $d_{il}$  and  $e_{il}$ . Here, the subscript  $i$  corresponds to the  $x, y$ , or  $z$  axes, indicated by the numbers 1, 2, and 3. The subscript  $l$  represents the second-order tensor  $xx, yy, zz, yz, zx, xy$ , which are denoted by the numbers 1, 2, 3, 4, 5, and 6, respectively.<sup>2</sup>

The fourth-order tensor elastic stiffness coefficient  $C_{kl}$  serves as a link connecting  $e_{il}$  and  $d_{ik}$ :

$$e_{il} = d_{ik} C_{kl}, \quad (\text{S3})$$

where the subscript  $i$  in the piezoelectric strain coefficient indicates the polarization direction.

The  $e_{il}$ ,  $d_{ik}$  and  $C_{kl}$  are all determined by the lattice symmetry, with each being expressed as a matrix. The CrSBr monolayer possesses a  $D_{2h}$  space point group (Pmmn spatial symmetry), indicating a center of symmetry in the vertical direction ( $z$ -direction). Consequently, it lacks out-of-plane piezoelectricity, leading to a matrix element of 0 for

$i = 3$  in  $e_{il}$  and  $d_{ik}$ . When atomic substitutions create the CrXSYZBr monolayers from the CrSBr monolayer, the resulting structures exhibit  $C_{2v}$  space point group (Pmm2 spatial symmetry). This alteration breaks the vertical symmetry of the CrSBr monolayer, allowing for the expression of  $e_{il}$ ,  $C_{kl}$  and  $d_{ik}$  in CrXSYZBr monolayers as follows:

$$e_{il} = \begin{pmatrix} 0 & 0 & 0 & 0 & e_{15} & 0 \\ 0 & 0 & 0 & e_{24} & 0 & 0 \\ e_{31} & e_{32} & e_{33} & 0 & 0 & 0 \end{pmatrix}, \quad (\text{S4})$$

$$C_{kl} = \begin{pmatrix} C_{11} & C_{12} & C_{13} & 0 & 0 & 0 \\ C_{12} & C_{22} & C_{23} & 0 & 0 & 0 \\ C_{13} & C_{23} & C_{33} & 0 & 0 & 0 \\ 0 & 0 & 0 & C_{44} & 0 & 0 \\ 0 & 0 & 0 & 0 & C_{55} & 0 \\ 0 & 0 & 0 & 0 & 0 & C_{66} \end{pmatrix}, \quad (\text{S5})$$

$$d_{ik} = \begin{pmatrix} 0 & 0 & 0 & 0 & d_{15} & 0 \\ 0 & 0 & 0 & d_{24} & 0 & 0 \\ d_{31} & d_{32} & d_{33} & 0 & 0 & 0 \end{pmatrix}, \quad (\text{S6})$$

The relational expressions for the out-of-plane piezoelectric coefficients are derived:

$$d_{31} = \frac{Ae_{31} + Be_{32} + Ce_{33}}{G}, \quad (\text{S7})$$

$$d_{32} = \frac{Be_{31} + De_{32} + Ee_{33}}{G}, \quad (\text{S8})$$

$$d_{33} = \frac{Ce_{31} + Ee_{32} + Fe_{33}}{G}, \quad (\text{S9})$$

where  $A = C_{22}C_{33} - C_{23}^2$ ,  $B = C_{13}C_{23} - C_{12}C_{33}$ ,  $C = C_{12}C_{23} - C_{13}C_{22}$ ,  $D = C_{11}C_{33} - C_{13}^2$ ,  $E = C_{12}C_{13} - C_{11}C_{23}$ ,  $F = C_{11}C_{22} - C_{12}^2$  and  $G = C_{12}(C_{13}C_{23} - C_{12}C_{33}) + C_{22}(C_{11}C_{33} - C_{13}^2) + C_{23}(C_{13}C_{12} - C_{11}C_{23})$ .

The deformation potential approximation is a widely used method for determining carrier mobility.<sup>3-5</sup> In the case of 2D structures, the calculation of carrier mobility follows a specific formula:<sup>6</sup>

$$\mu_{2D} = \frac{e\hbar^3 C_{2D}}{k_B T m^* \sqrt{m_x m_y} E_d^2}, \quad (S10)$$

where  $e$  is the elementary charge,  $C_{2D}$  denotes for the elastic modulus,  $E_d$  signifies the deformation potential constant,  $k_B$  and  $\hbar$  correspond to the Boltzmann constant and the reduced Planck constant,  $m^*$  represents for effective mass and the average effective mass of carriers, and  $T = 300$  K is the temperature utilized in these calculations.

The effective masses of electrons ( $m_e^*$ ) and holes ( $m_h^*$ ) can be determined by fitting a parabolic function to the band edges (CBM and VBM) using the following expression:

$$\frac{1}{m^*} = \frac{1}{\hbar} \left| \frac{\partial^2 E(k)}{\partial k^2} \right|, \quad (S11)$$

where  $E(k)$  represents the energy dependence on the wave vector  $k$  at the CBM/VBM in the  $k_x$ - $k_y$  plane. The carrier transport characteristics are studied in two distinct directions within the reciprocal lattice space.

The 2D materials' elastic modulus  $C_{2D}$  is expressed as following:

$$C_{2D} = \frac{1}{S_{uni}} \frac{\partial^2 E_{tot}}{\partial \epsilon_{uni}^2}, \quad (S12)$$

where  $S_{uni}$ ,  $E_{tot}$  and  $\epsilon_{uni}$  symbolize the optimized unit cell area, total energy and uniaxial strain along the  $x$  and  $y$  carrier transport directions, respectively. The deformation potential constant  $E_d$  is determined using the formula:

$$E_d = \frac{\Delta E_{edge}}{\epsilon_{uni}}, \quad (S13)$$

the term  $\Delta E_{edge}$  denotes the energy shifting of the band edges relative to the vacuum level.

**Table S1** Band gaps (eV) of CrSBr and Cr $XY$ Br $Z$  in GGA+ $U$  calculation and GGA+ $U$  calculation with spin-orbit coupling (SOC).

| Band gap | CrSBr | Cr <sub>2</sub> S <sub>2</sub> BrH | Cr <sub>2</sub> S <sub>2</sub> BrF | Cr <sub>2</sub> S <sub>2</sub> BrCl | Cr <sub>2</sub> S <sub>2</sub> SeBr <sub>2</sub> | CrMoS <sub>2</sub> Br <sub>2</sub> |
|----------|-------|------------------------------------|------------------------------------|-------------------------------------|--------------------------------------------------|------------------------------------|
| GGA+ $U$ | 0.65  | 0.47                               | 0.56                               | 0.69                                | 0.32                                             | 0.002                              |
| SOC      | 0.61  | 0.46                               | 0.19                               | 0.23                                | 0.10                                             | Metal                              |

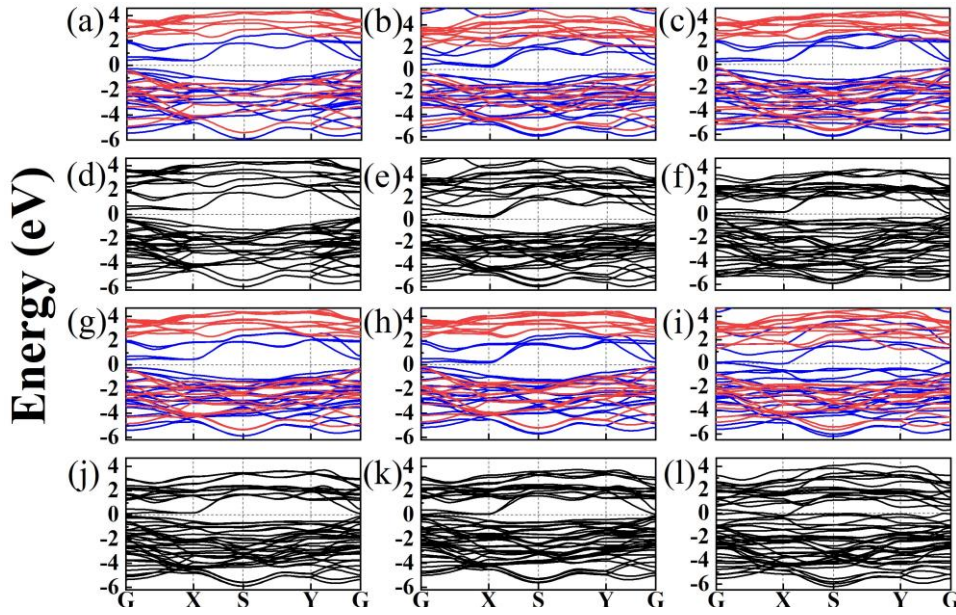

**Fig. S1** Electronic band structures of (a), (d) CrSBr, (b), (e) Cr<sub>2</sub>S<sub>2</sub>BrH, (c), (f) Cr<sub>2</sub>S<sub>2</sub>BrF, (g), (j) Cr<sub>2</sub>S<sub>2</sub>BrCl, (h), (k) Cr<sub>2</sub>S<sub>2</sub>SeBr<sub>2</sub>, and (i), (l) CrMoS<sub>2</sub>Br<sub>2</sub> in GGA +  $U$  calculation ( (a) – (c) and (g) – (i) ) and GGA +  $U$  calculation with SOC ( (d) – (f) and (j) – (l) ).  $U^{\text{Cr}} = 3$  eV and  $U^{\text{Mo}} = 2$  eV, blue and red lines manifest spin-up and spin-down, respectively.

**Table S2** Relative total energies  $\Delta E$  (meV/unit cell), local spin moments ( $\mu_B$ ) of atoms in CrXSYBrZ monolayers by GGA+ $U$ .

| Material                            | states | $\Delta E$ | Z1 <sup>-</sup> | X1 <sup>3+</sup> | Y1 <sup>2-</sup> | S2 <sup>2-</sup> | Cr2 <sup>3+</sup> | Br <sup>2-</sup> |
|-------------------------------------|--------|------------|-----------------|------------------|------------------|------------------|-------------------|------------------|
| CrSBr                               | FM     | -64        | -0.06           | 3.25             | -0.22            | -0.22            | 3.25              | -0.06            |
|                                     | AFM    | 49         | 0.05            | 3.19             | 0.03             | -0.03            | -3.19             | -0.05            |
| Cr <sub>2</sub> S <sub>2</sub> BrH  | FM     | -36        | -0.06           | 3.28             | -0.21            | -0.25            | 3.22              | -0.06            |
|                                     | AFM    | 108        | 0.05            | -3.19            | -0.03            | 0.07             | 3.13              | -0.04            |
| Cr <sub>2</sub> S <sub>2</sub> BrF  | FM     | -36        | 0.01            | 3.22             | -0.21            | -0.24            | 3.21              | -0.05            |
|                                     | AFM    | 83         | -0.04           | -3.15            | -0.01            | -0.03            | 3.16              | 0.05             |
| Cr <sub>2</sub> S <sub>2</sub> BrCl | FM     | -37        | -0.04           | 3.24             | -0.22            | -0.23            | 3.24              | -0.06            |
|                                     | AFM    | 75         | -0.05           | -3.17            | 0.04             | -0.03            | -3.18             | 0.04             |
| Cr <sub>2</sub> SSeBr <sub>2</sub>  | FM     | -82        | -0.07           | 3.27             | -0.26            | -0.24            | 3.34              | -0.06            |
|                                     | AFM    | 33         | 0.05            | -3.24            | -0.05            | 0.03             | 3.27              | -0.05            |
| CrMoS <sub>2</sub> Br <sub>2</sub>  | FM     | -77        | 0.04            | 2.65             | -0.16            | -0.13            | 3.40              | -0.13            |
|                                     | AFM1   | 109        | 0.07            | 2.66             | 0.09             | 0.07             | -3.19             | 0.04             |
|                                     | AFM2   | 109        | -0.07           | -2.66            | -0.09            | -0.07            | 3.19              | -0.04            |

**Table S3** Intralayer exchange parameters  $J_1$ ,  $J_2$  and  $J_3$  of Cr<sub>2</sub>S<sub>2</sub>BrZ and Cr<sub>2</sub>SSeBr<sub>2</sub> monolayers (in units of meV).

|       | Cr <sub>2</sub> S <sub>2</sub> BrH | Cr <sub>2</sub> S <sub>2</sub> BrF | Cr <sub>2</sub> S <sub>2</sub> BrCl | Cr <sub>2</sub> SSeBr <sub>2</sub> |
|-------|------------------------------------|------------------------------------|-------------------------------------|------------------------------------|
| $J_1$ | 2.52                               | 2.23                               | 3.97                                | 4.33                               |
| $J_2$ | 6.90                               | 5.80                               | 5.45                                | 5.56                               |
| $J_3$ | 0.84                               | 1.87                               | 2.78                                | 0.54                               |

**Table S4** The contribution of the piezoelectric stress coefficients  $e_{33}$  electron part  $e_{33}$ -*ele* and the ion part  $e_{33}$ -*ion* ( $10^{-10}$  C/m) in CrXSYBrZ monolayers.

| Material                            |               | $e_{33}$ - <i>ele</i> | $e_{33}$ - <i>ion</i> | $e_{33}$ |
|-------------------------------------|---------------|-----------------------|-----------------------|----------|
| CrSBr                               | GGA           | 0.0                   | 0.0                   | 0.0      |
|                                     | GGA+ <i>U</i> | 0.0                   | 0.0                   | 0.0      |
| Cr <sub>2</sub> S <sub>2</sub> BrH  | GGA           | -0.57                 | -0.36                 | -0.93    |
|                                     | GGA+ <i>U</i> | -0.52                 | -0.35                 | -0.87    |
| Cr <sub>2</sub> S <sub>2</sub> BrF  | GGA           | -1.70                 | 0.16                  | -1.54    |
|                                     | GGA+ <i>U</i> | -1.57                 | 0.11                  | -1.46    |
| Cr <sub>2</sub> S <sub>2</sub> BrCl | GGA           | -0.47                 | 0.07                  | -0.40    |
|                                     | GGA+ <i>U</i> | -0.46                 | 0.07                  | -0.39    |
| Cr <sub>2</sub> SSeBr <sub>2</sub>  | GGA           | 0.34                  | -0.06                 | 0.28     |
|                                     | GGA+ <i>U</i> | 0.34                  | -0.06                 | 0.28     |
| CrMoS <sub>2</sub> Br <sub>2</sub>  | GGA           | 0.64                  | -0.005                | 0.64     |
|                                     | GGA+ <i>U</i> | 0.50                  | -0.004                | 0.49     |

## REFERENCES

1. L. Dong, J. Lou and V. B. Shenoy, *Acs Nano*, 2017, **11**, 8242-8248.
2. H. N. Zhang, Y. Wu, C. H. Yang, L. H. Zhu and X. C. Wang, *Physical Review B*, 2021, **104**, 235437.
3. J. Bardeen and W. Shockley, *Physical Review*, 1950, **80**, 72-80.
4. N. N. Hieu, H. V. Phuc, A. I. Kartamyshev and T. V. Vu, *Physical Review B*, 2022, **105**, 075402.
5. T. Zhang, Y. D. Ma, L. Yu, B. B. Huang and Y. Dai, *Materials Horizons*, 2019, **6**, 1930-1937.
6. W. H. Wan, S. Zhao, Y. F. Ge and Y. Liu, *Journal of Physics-Condensed Matter*, 2019, **31**, 435501.
